# Supplementary material
Source: MDPI journal article supplement (https://www.mdpi.com/1999-4907/8/5/159)
Supplement: s1 [file s1]

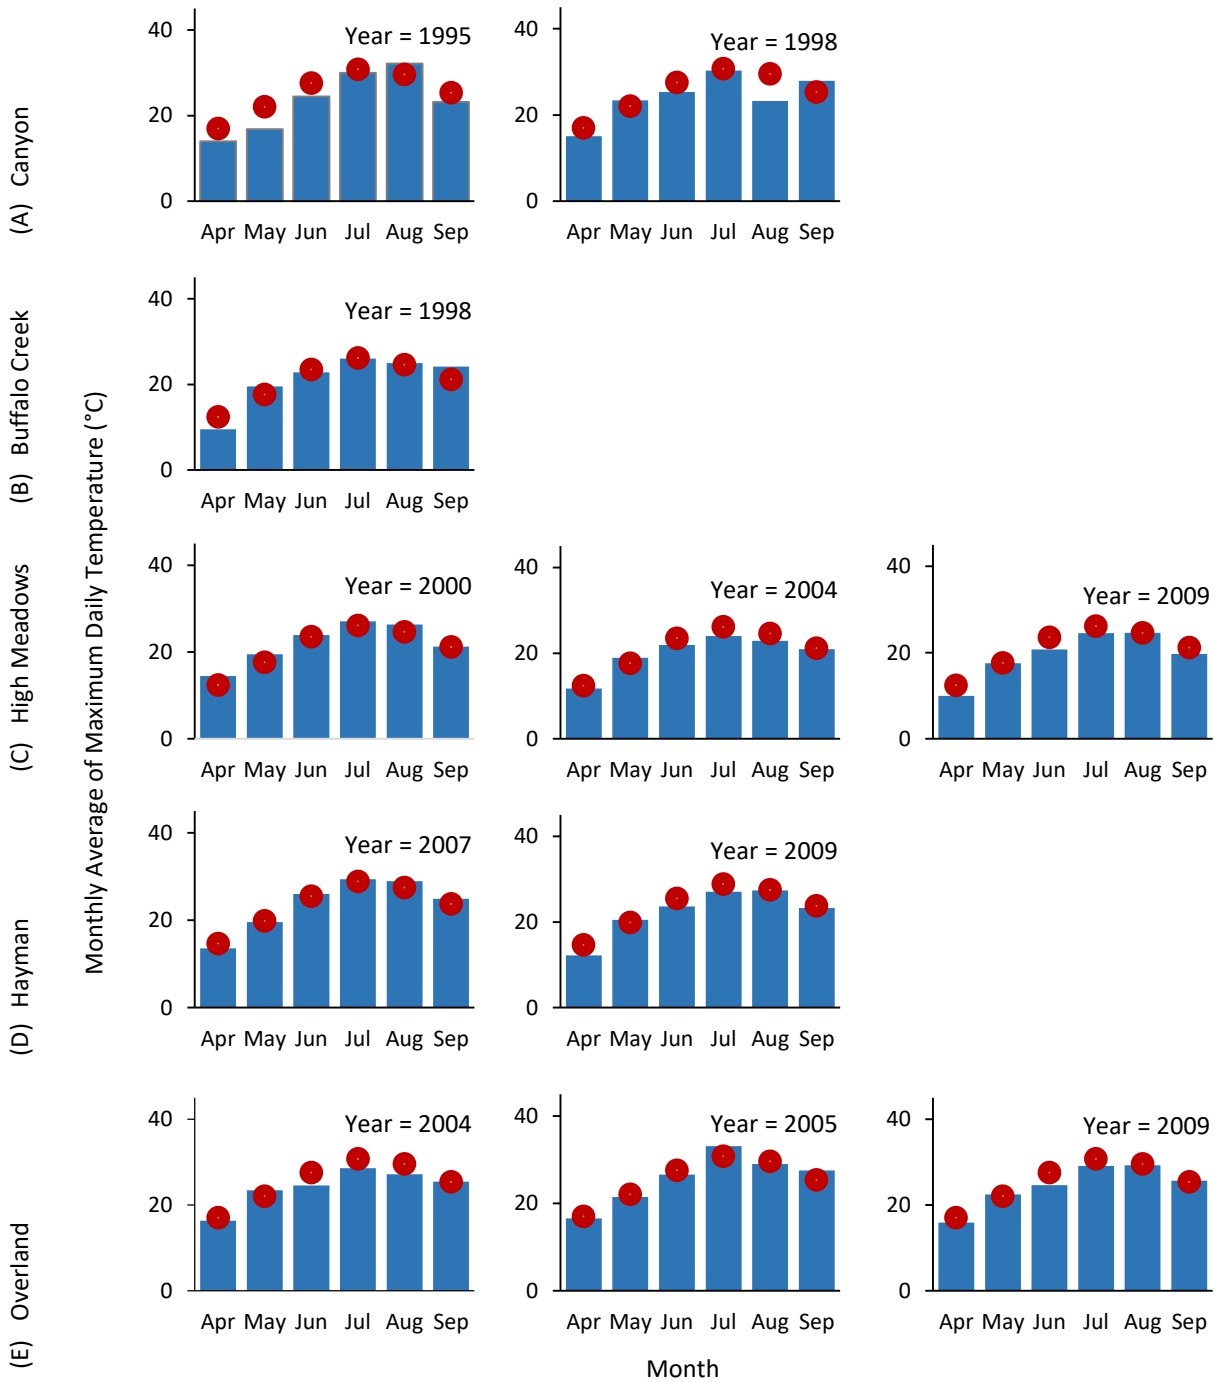

Supplementary Figure S1. Monthly average maximum daily temperature (°C) for the growing season (April-September) during years of episodic establishment at each site. The dots over the bars represent the monthly mean for the long-term record (1961-2010), for comparison. Establishment years here are years in which a minimum of 20% of all ponderosa pine and Douglas-fir seedlings established.
